# Supplementary material
Source: PubMed Central journal article supplement (PMC514380)

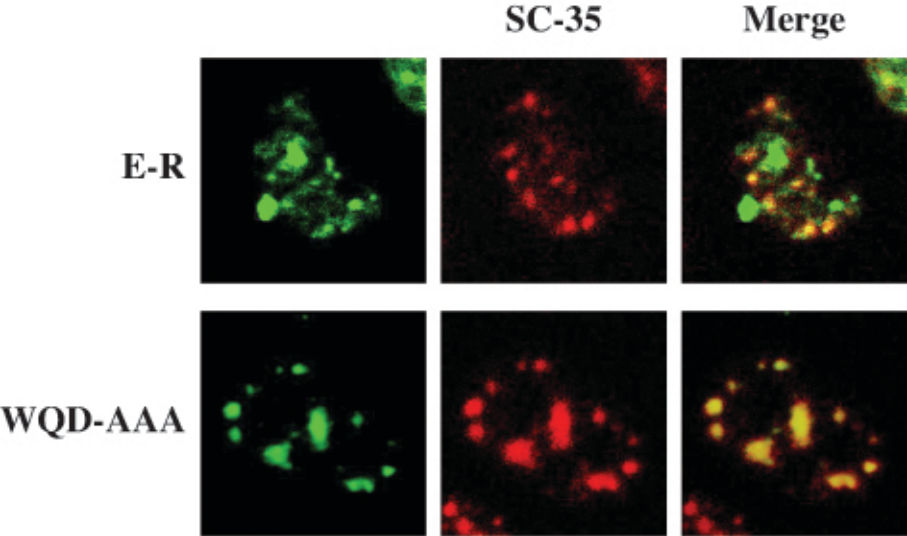

Chiodi et al.  
Supplementary Figure 1

Supplement: nar_32_14_4127__1.pdf [file nar_32_14_4127__1.pdf]

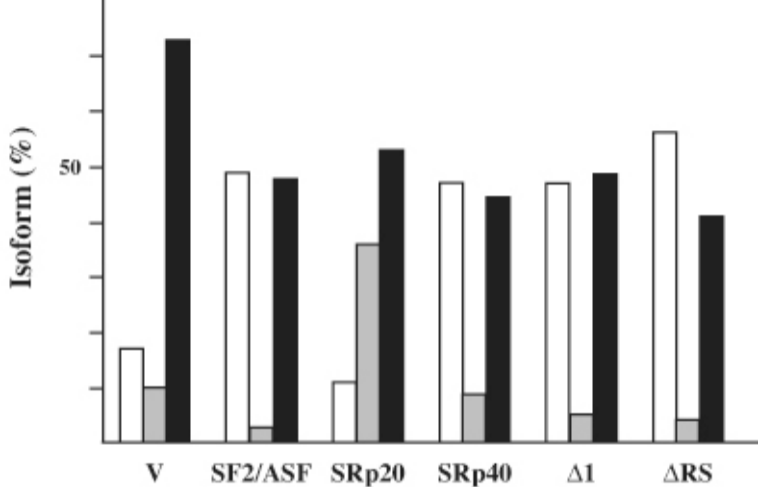

Chiodi et al  
Supplementary Figure 2

Supplement: nar_32_14_4127__2.pdf [file nar_32_14_4127__2.pdf]
